# Supplementary material
Source: publisher figshare collection journal article supplement (https://gsajournals.figshare.com/ndownloader/files/25833992)
Supplement: Supplementary file 1 [file 25833992]

## Sheet: Sheet1
Paxton Benthic Chromsome	Number of CENPA repeats	CEN Start	CEN END
chrI	110	19538085	20530105
chrII	104	1473912	1693008
chrIII	31	3449682	3455857
chrIV	NA	NA	NA
chrV	1	455449	455351
chrVI	127	15696875	15721762
chrVIII	NA	NA	NA
chrVIII	92	1221916	1239394
chrIX	9	17325576	17327444
chrX	81	873948	888843
chrXI	210	16842761	16881287
chrXII	213	19065150	19106188
chrXIII	100	1873390	1899199
chrXIV	435	1783544	1865507
chrXV	14	2705609	2708787
chrXVI	NA	NA	NA
chrXVII	25	8215051	8312134
chrXVIII	258	11534785	11681838
chrXIX	185	19485627	19756304
chrXX	86	20142862	20159254
chrXXI	199	14465842	14504182
